# Supplementary material for: Inflammatory Human Umbilical Cord-Derived Mesenchymal Stem Cells Promote Stem Cell-Like Characteristics of Cancer Cells in an IL-1β-Dependent Manner
Source: Hindawi journal article supplement (doi:10.1155/2018/7096707), 2018-01-01

**A**

**MDA-MB-231**

**CON**

**MSC**

**48 h**

**72 h**

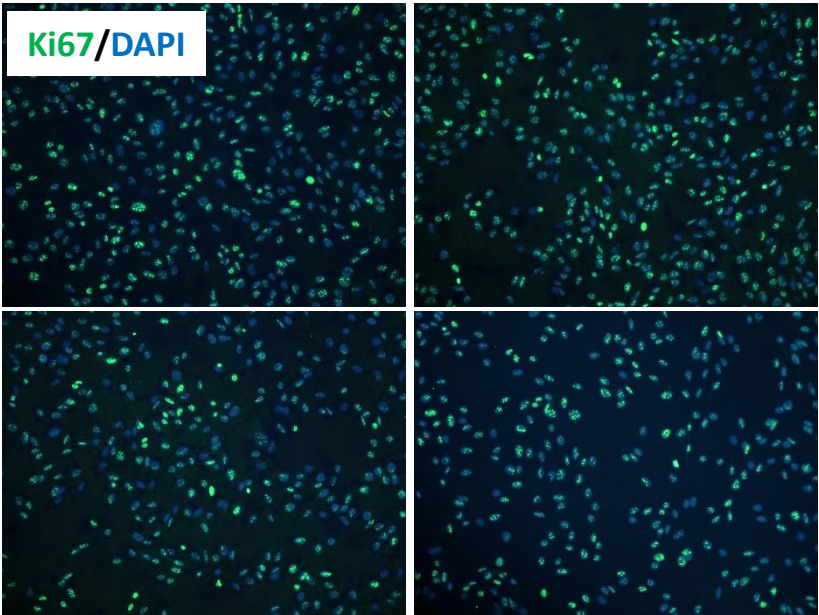

**B**

**IGROV1**

**CON**

**MSC**

**48 h**

**72 h**

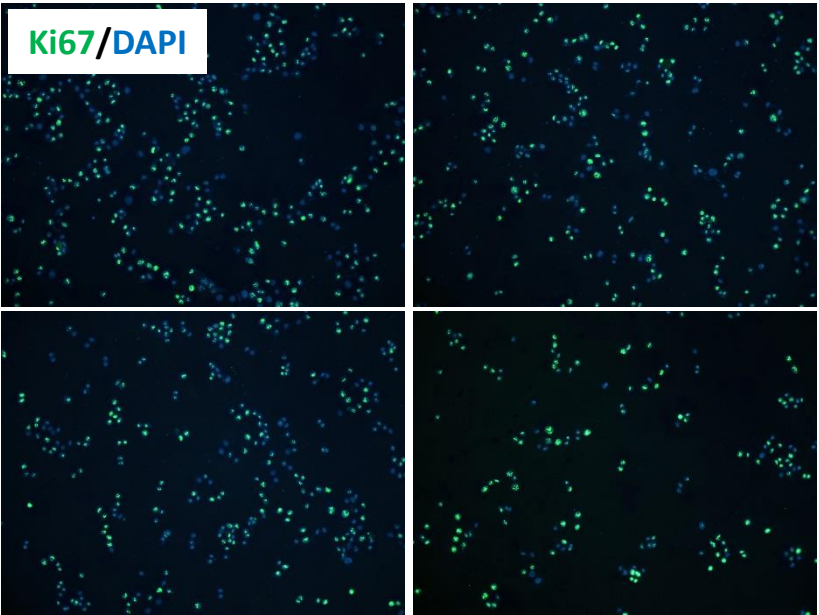

**A** **MDA-MB-231**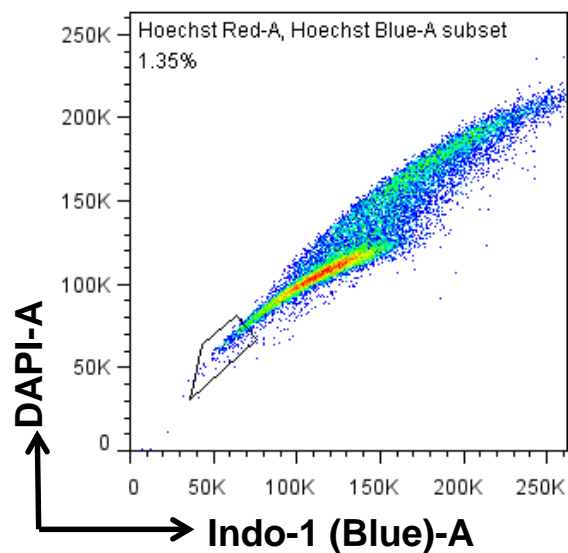**Reserpine**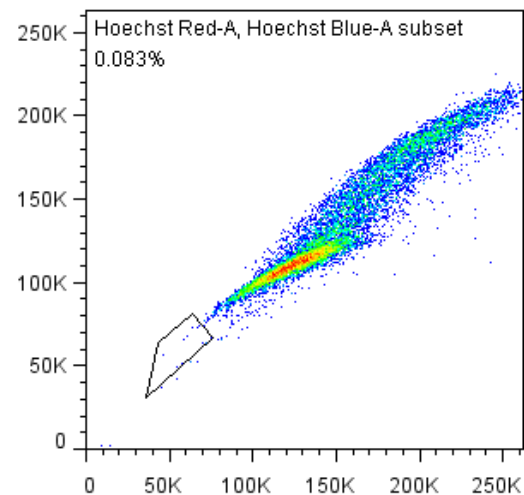**B** **IGROV1**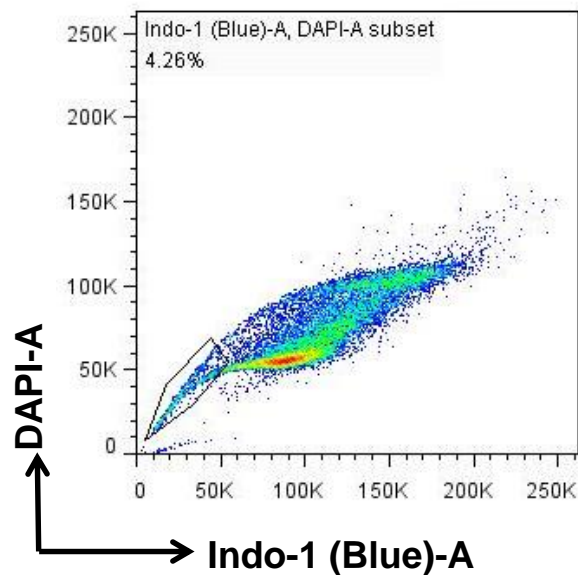**Verapamil**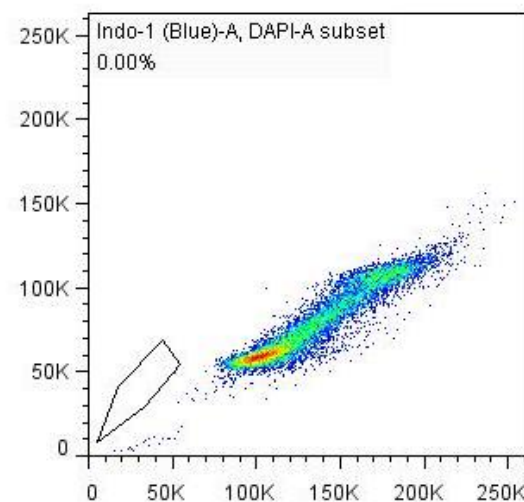

# MDA-MB-231

CON

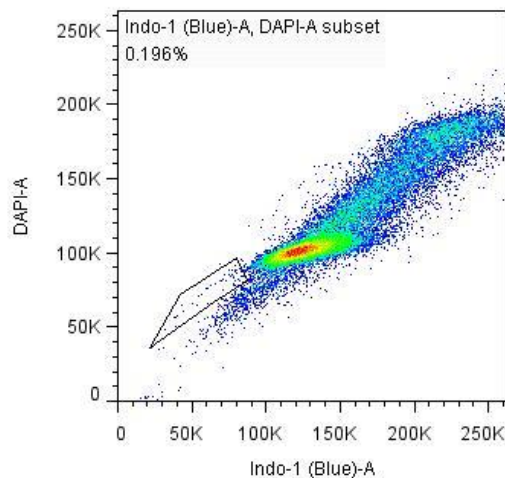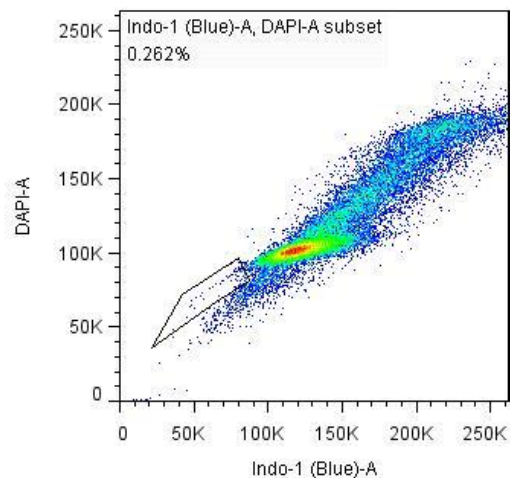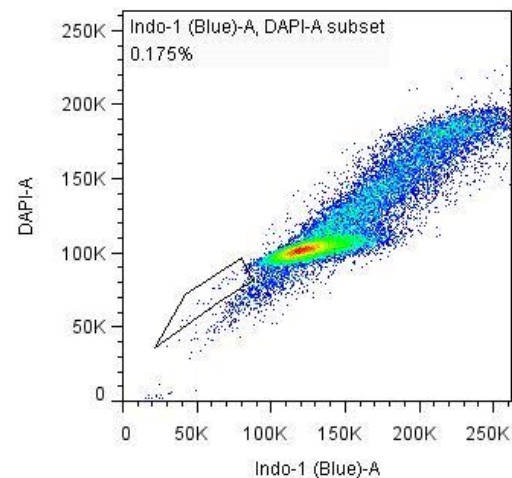

MSC

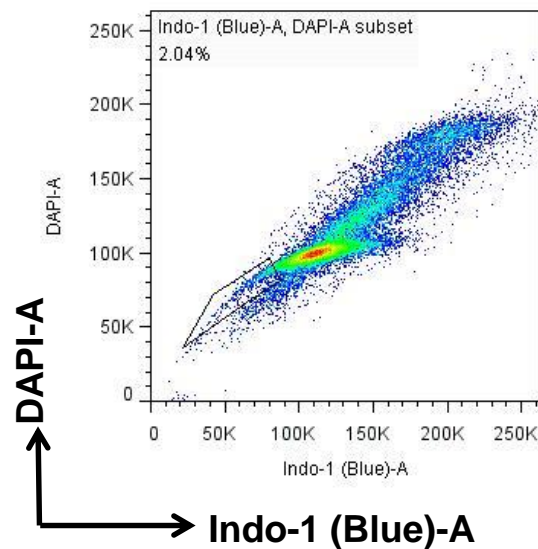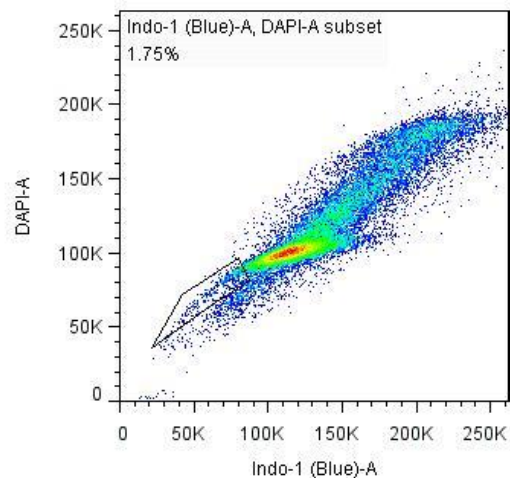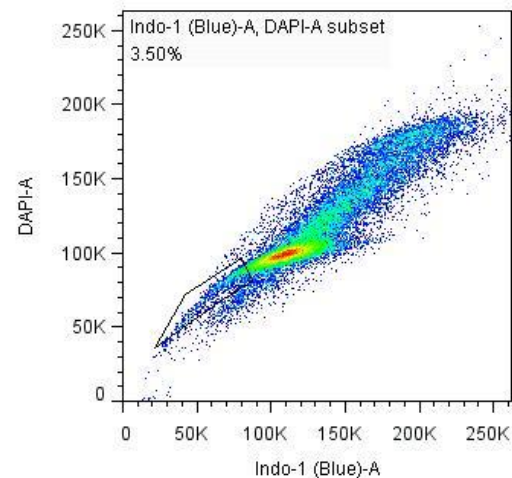

# IGROV1

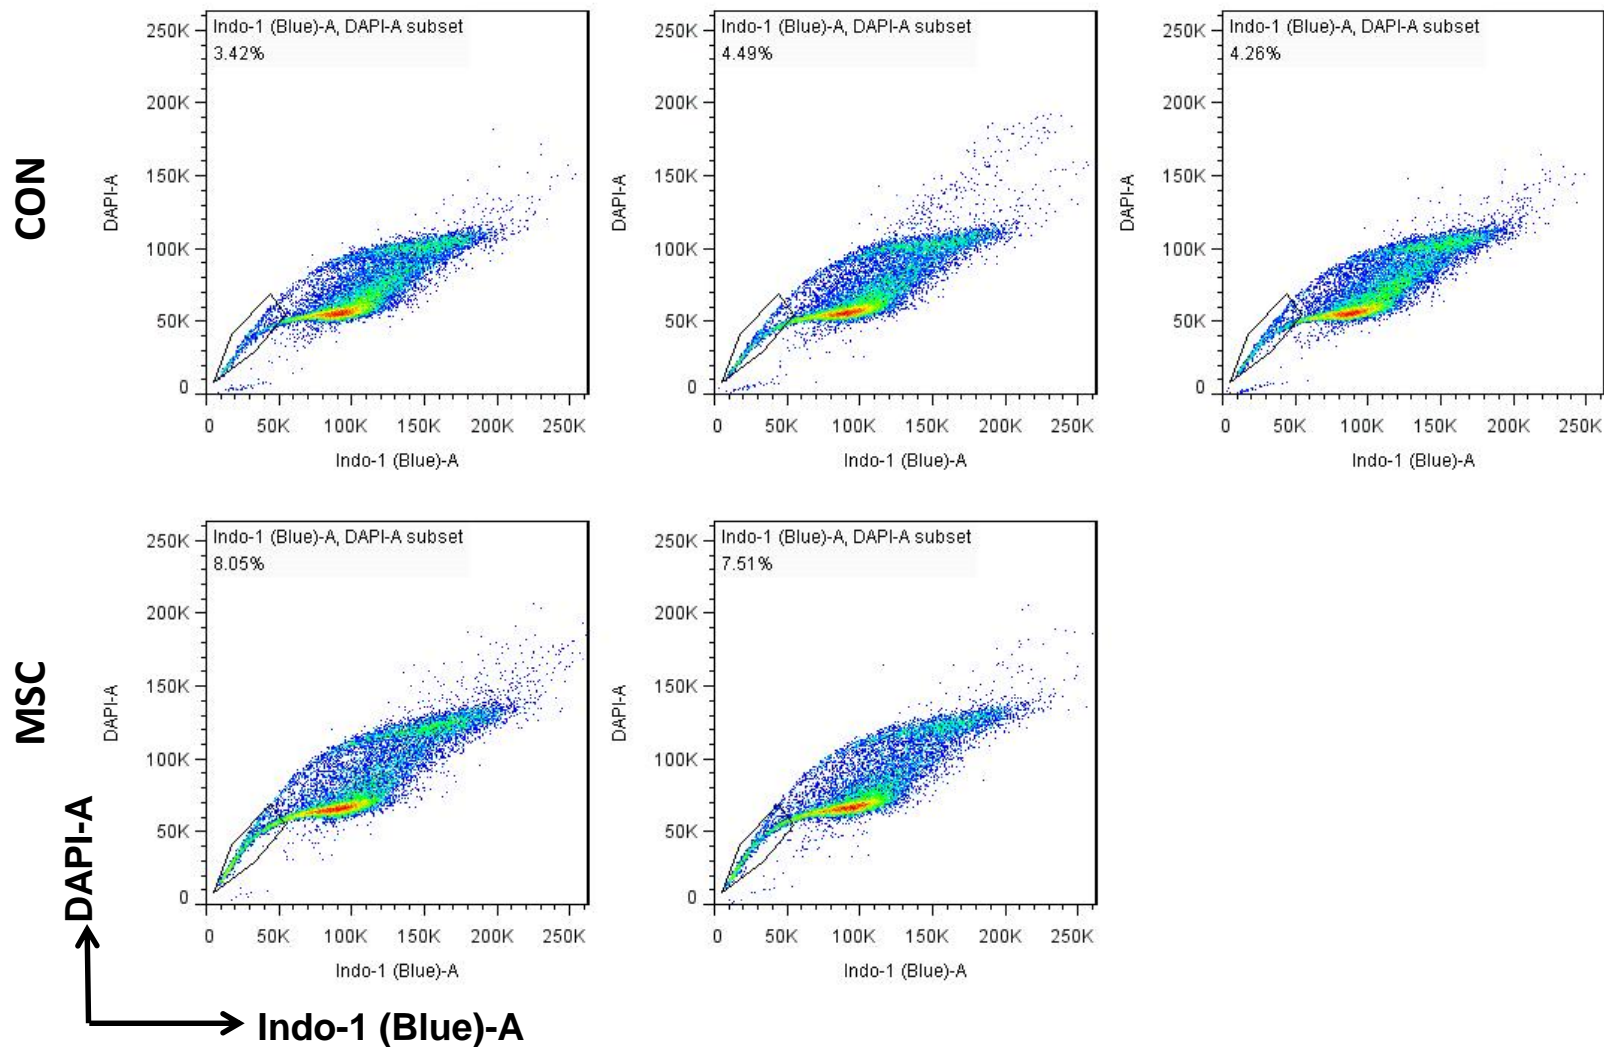

Supplement: f1 [file 7096707.f1.pdf]
